# Supplementary material for: Elucidating mysteries of phase-segregated membranes: mobile-lipid recruitment facilitates pores’ passage to the fluid phase
Source: Royal Society of Chemistry journal article supplement (doi:10.1039/c8cp00958a), 2018-01-01
Supplement: c8cp00958a1.pdf [file c8cp00958a1.pdf]

## Supplementary Information for

### “Elucidating Mysteries of Phase-Segregated Membranes: Mobile-Lipid Recruitment Facilitates Pores’ Passage to the Fluid Phase”

Jesús M. López Martí,<sup>1</sup> Niall J. English<sup>2</sup> and Mario G. Del Pópolo<sup>1,3</sup> \*

<sup>1</sup>*CONICET & Facultad de Ciencias Exactas y Naturales, Universidad Nacional de Cuyo, Padre Jorge Contreras 1300, CP5500, Mendoza, Argentina.*

<sup>2</sup>*School of Chemical and Bioprocess Engineering, University College Dublin, Belfield, Dublin 4, Ireland.*

<sup>3</sup>*Atomistic Simulation Centre, School of Mathematics and Physics, Queen's University Belfast, University Road, Belfast BT7 INN, UK.*

#### Table of contents:

1. **Figure S1:** Local composition across a phase-segregated dipalmitoyl-phosphatidylcholine (DPPC):dilinoleyl-phosphatidylcholine (DIPC):cholesterol (CHOL), membrane.
2. The movie files **xi-0.8-phase-segregated-bilayer-top-view.mpg** and **xi-0.8-phase-segregated-bilayer-water-side-view.mpg** show the time evolution of the system (~2  $\mu$ s) after a pore ( $\xi_0=0.8$ ,  $R\sim 1$ nm) was created at the centre of the  $L_o$  domain. The bilayer is depicted from above. At some point, the pore moves across the periodic y-boundary of the simulation cell. Colour code: DPPC-DIPC-CHOL = Blue-Red-Yellow. The second movie shows a lateral view of the system along the y-axis. Only water molecules were included in the rendering, to emphasize the membrane surfaces and the drifting transmembrane water channel.
3. **Figure S2:** Pore radii as a function of time.
4. **Figure S3:** Time evolution of membrane excess area.
5. **Figure S4:** Time evolution of mismatch area between domains’ upper and lower leaflets.
6. **Figure S5:** Functional relationship between order parameter ( $\xi$ ) and pore radius ( $R$ ).
7. **Figure S6:** Difference in free energy cost for creating pores in the bulk of  $L_o$  or  $L_d$  phases, i.e  $\Delta G_{L_d}(R) - \Delta G_{L_o}(R)$ .
8. **Figure S7:** Least-square fittings to the Classical Nucleation Theory expression for the pore energy.

---

\* Corresponding author: mdelpopolo@fcen.uncu.edu.ar & m.delpopolo@qub.ac.uk

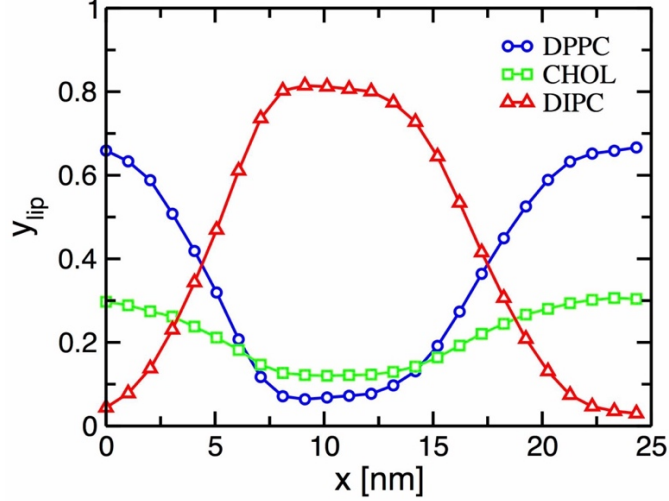

**Figure S1:** Membrane composition across a phase-segregated dipalmitoyl-phosphatidylcholine (DPPC), dinoleyl-phosphatidylcholine (DIPC), and cholesterol (CHOL) membrane (DPPC:DIPC:CHOL) at  $T=295\text{K}$ . The  $x$ -direction runs perpendicular to the domain borders;  $y_{\text{lip}} = N_i / (N_{\text{DPPC}} + N_{\text{DIPC}} + N_{\text{Chol}})$ . The DPPC-rich  $L_o$  domain has an average composition of (0.67:0.04:0.29). The DIPC-rich  $L_d$  domain has a composition of (0.07:0.81:0.12). As noticed by Risselada et al. a temperature of 295K is optimal to observe clear phase separation within accessible simulation time scales. A higher temperature brings the system closer to the critical point making the identification of phase domains much more difficult.

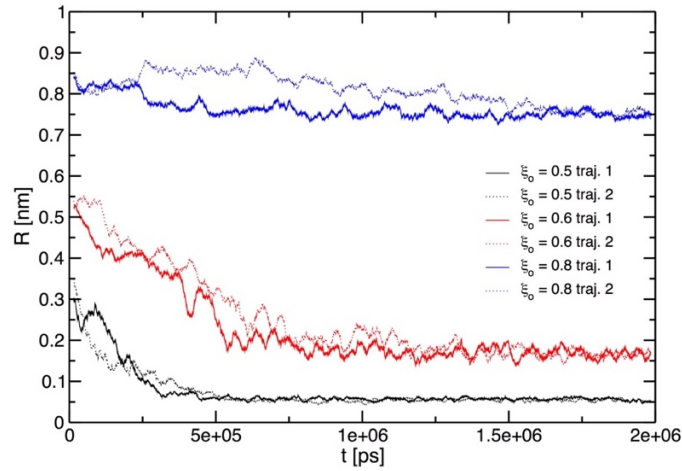

**Figure S2:** Pore radius,  $R$ , as a function of time for each of the 2  $\mu\text{s}$  MD production runs reported in the paper. In all cases pores were created ( $t=0$ ) at the centre of the  $L_o$  domain, on the final configuration of the 4  $\mu\text{s}$  simulation of the phase-segregated membrane. In order to prevent spontaneous pore collapse,  $\xi_0$  was harmonically restrained to the values annotated on the figure. Larger pores ( $\xi_0=0.8$ ) do not change size when crossing the domain boundary, smaller pores do ( $\xi_0=0.6, 0.5$ ). For  $\xi_0=0.8$  and 0.6 pores are toroidal and hydrophilic, whether located in  $L_o$  or  $L_d$ , and a water channel crosses the bilayer. For  $\xi_0=0.5$ , the membrane defect is hydrophobic and amounts to a local lowering of the lipids density.

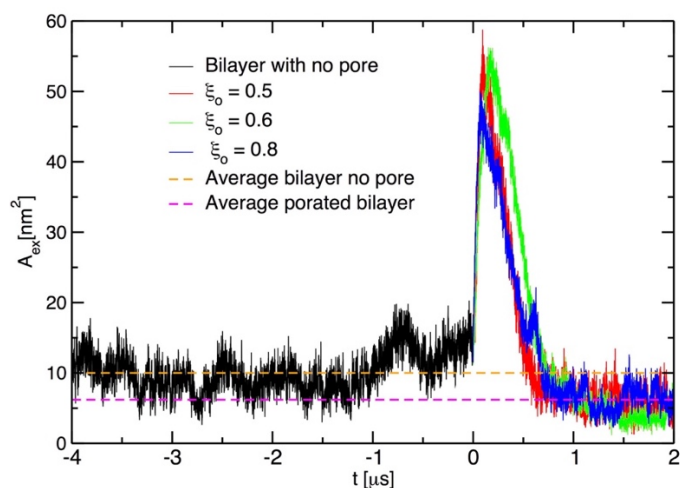

**Figure S3:** Time evolution of membrane excess area. The excess area is the difference between the actual surface area of the undulated membrane and the simulation box's X-Y area. The area of the undulated membrane was computed by fitting a geometric surface to the phosphate groups of DPPC and DIPC, as described in ref. 29, and implemented in g\_lomepro.<sup>2</sup> This utility code also allowed us to correlate pore position with local membrane curvature. The black line (spanning negative times) corresponds to  $A_{\text{ex}}$  evaluated on the non-porated phase-segregated bilayer. Pores with  $\xi_0=0.8$ (blue),  $\xi_0=0.6$ (green), and  $\xi_0=0.5$ (red), created at  $t=0$ , immediately induce membrane bending resulting in larger values of  $A_{\text{ex}}$ . The deformation relaxes as stress is released while the pores drift and reach the centre of the  $L_d$  phase.

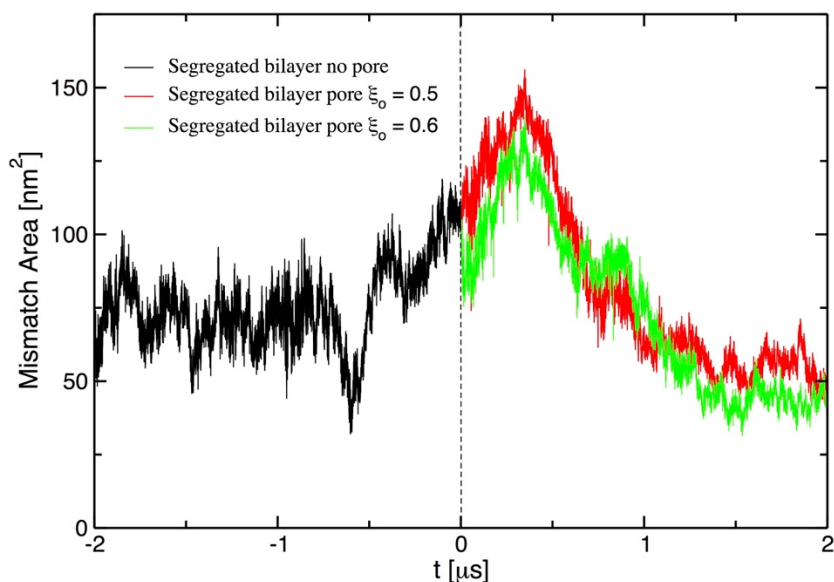

**Figure S4:** The mismatch area quantifies the overall extent to which the domains' upper and lower leaflets are out of kilter. The positive value shown by the non-porated

<sup>2</sup> [http://www3.mpibpc.mpg.de/groups/de\\_groot/g\\_lomepro.html](http://www3.mpibpc.mpg.de/groups/de_groot/g_lomepro.html)

membrane (black line) is due to a small surface tension that controls the degree of registration between the two domain leaflets (see ref. 3). Pores are created in  $L_o$  at  $t=0$ , inducing membrane curvature and pushing the upper and lower leaflets out of kilter. The mismatch area goes back to normal once the pores reach  $L_d$ . Only one trajectory for  $\xi_0=0.6$ (green) and  $\xi_0=0.5$ (red) is shown, the others depict similar trends.

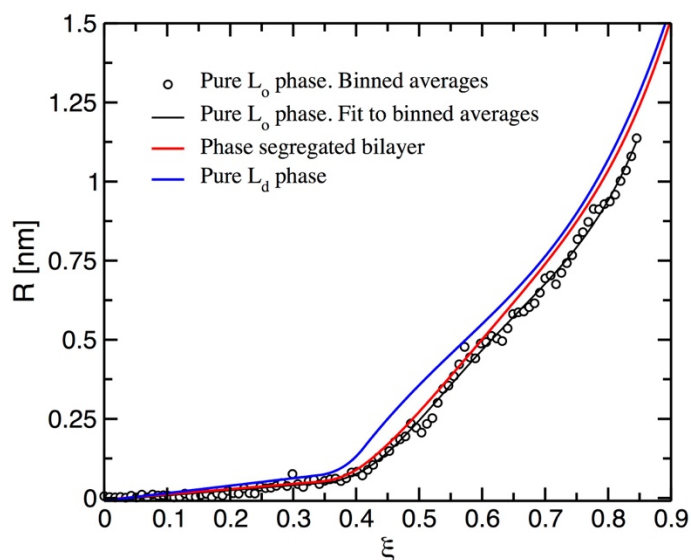

**Figure S5:**  $R(\xi)$  functions computed by Monte Carlo (see paper) from the various simulated systems, as annotated on Figure.

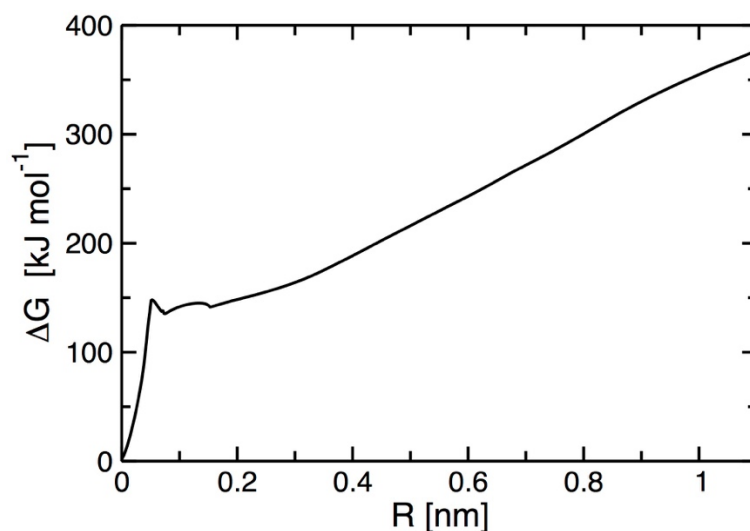

**Figure S6:** Difference in free energy cost for creating a pore of radius  $R$  in the bulk of  $L_o$  or  $L_d$ , i.e.  $\Delta G(R) = \Delta G_{L_d}(R) - \Delta G_{L_o}(R)$ .  $-\Delta G(R)$  is the driving force that pushes the pore from  $L_o$  to  $L_d$ .

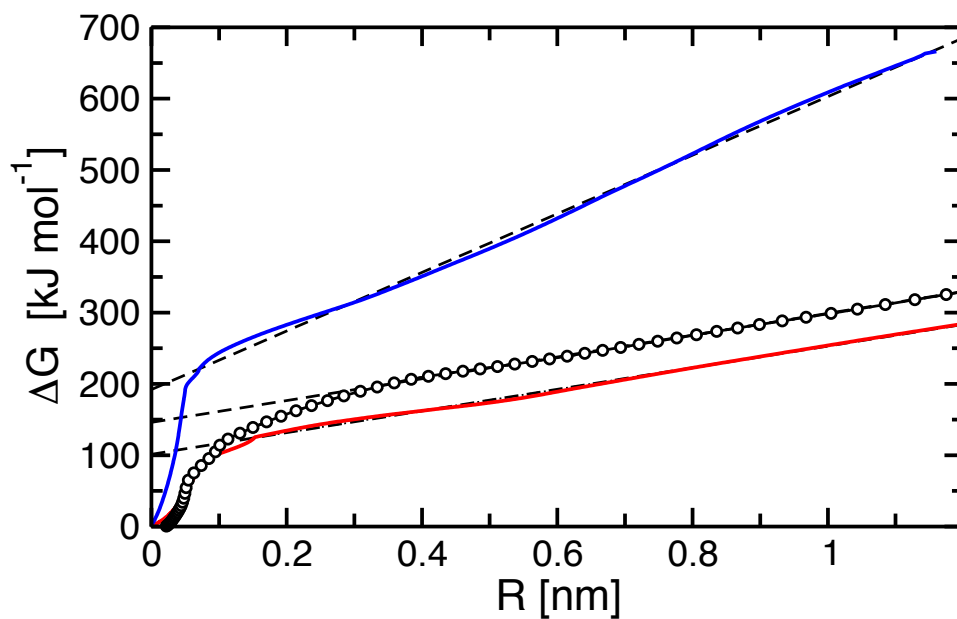

**Figure S7:** Free-energy vs. pore radius, as shown in the bottom panel of Figure 4. The dashed lines are least-square fittings to the Classical Nucleation Theory expression for the pore energy (equation 1 in the manuscript, with  $\gamma_s = 0$ ) in the  $R \in (0.3-1.3)$  nm interval. In each case, the ordinate of the origin provides  $\Delta G_n$ , the slope allows to compute  $\gamma_L$ .
